# Supplementary material
Source: PubMed Central journal article supplement (PMC1629058)

# **ELECTRONIC APPENDIX**

This is the Electronic Appendix to the article

Identifying contact zone hotspots of passerine birds in the Palearctic Region

by

Mansour Aliabadian, Cees S. Roselaar, Vincent Nijman, Ronald Sluys and Miguel Vences

*Biol. Lett.* (doi:10.1098/rsbl.2004.0258)

Electronic appendices are refereed with the text; however, no attempt is made to impose a uniform editorial style on the electronic appendices.

## Appendix 1.

List of parapatric species pairs that do hybridise (H) or have a secondary contact zone in the Palearctic region, with the area of overlap (in 1000 km<sup>2</sup>). List compiled from Haffer (1977, 1992); information on hybridisation retrieved from Bures et al. (2002) and Randler (2002).

5 *Lanius cristatus* / *L. collurio* (H, 491), *L. cristatus* / *L. isabellinus* (H, 1036), *L. collurio* / *L. isabellinus* (H, 366), *L. schach* / *L. tephronotus* (532), *Corvus monedula* / *C. dauuricus* (H, 471), *C. corone* / *C. pectoralis* (309), *C. ruficollis* / *C. corax* (H, 1548), *Parus major* / *P. bokharensis* (H, 158), *P. xanthogenys* / *P. spilonotus* (195), *P. caeruleus* / *P. cyanus* (H, 979), *Delichon urbicum* / *D.*

10 *dasyypus* (175), *Aegithalos leucogenys* / *A. concinnus* (37), *A. niveogularis* / *A. iouschistos* (12), *Melanocorypha calandra* / *M. bimaculata* (2291), *Calandrella rufescens* / *C. cheleensis* (630), *Galerida cristata* / *G. theklae* (1767), *Alauda arvensis* / *A. gulgula* (353), *Eremophila alpestris* / *E. bilopha* (41), *Locustella lanceolata* / *L. fluviatilis* (151), *L. naevia* / *L. certhiola* (H, 885), *L. certhiola* / *L. ochotensis* (H, 134), *Acrocephalus arundinaceus* / *A. stentoreus* (366), *Hippolais languida* / *H.*

15 *olivetorum* (73), *H. polyglotta* / *H. icterina* (H, 110), *Phylloscopus collybita* / *P. lorenzii* (252), *P. bonelli* / *P. sibilatrix* (H, 975), *P. affinis* / *P. subaffinis* (154), *Sylvia curruca* / *S. althaea* (H, 162), *S. melanocephala* / *S. mystacea* (69), *Pomatorhinus erythrogenys* / *P. erythrocnemis* (130), *Garrulax maximus* / *G. ocellatus* (179), *Paradoxornis paradoxus* / *P. unicolor* (41), *Sitta nagaensis* / *S. castanea* (666), *S. neumayer* / *S. tephronota* (841), *Sturnus vulgaris* / *S. unicolor* (53), *Turdus*

20 *obscurus* / *T. pallidus* (516), *T. ruficollis* / *T. naumanni* (H, 914), *Luscinia luscinia* / *L. megarhynchos* (H, 890), *Oenanthe pleschanka* / *O. hispanica* (H, 1011 ), *O. leucopyga* / *O. leucura* (105), *Ficedula albicollis* / *F. semitorquata* (41), *Passer domesticus* / *P. indicus* (H, 183), *Motacilla alba* / *M. maderaspatensis* (175), *Anthus godlewskii* / *A. campestris* (471), *A. pratensis* / *A. spinoletta* (H, 79), *A. rubescens* / *A. spinoletta* (65), *Carduelis flammea* / *C. hornemanni* (743), *Bucanetes*

25 *githagineus* / *B. mongolica* (938), *Emberiza cia* / *E. godlewskii* (28), *E. hortulana* / *E. buchanani* (1015), *E. hortulana* / *E. caesia* (394), *E. melanocephala* / *E. bruniceps* (H, 37).

## Appendix 2.

Relationship between number of contact zones per grid cell and land area (equivalent to  
30 the number of grid cells) in the Palearctic region (figures above the bars represent  
percentages of total land area).

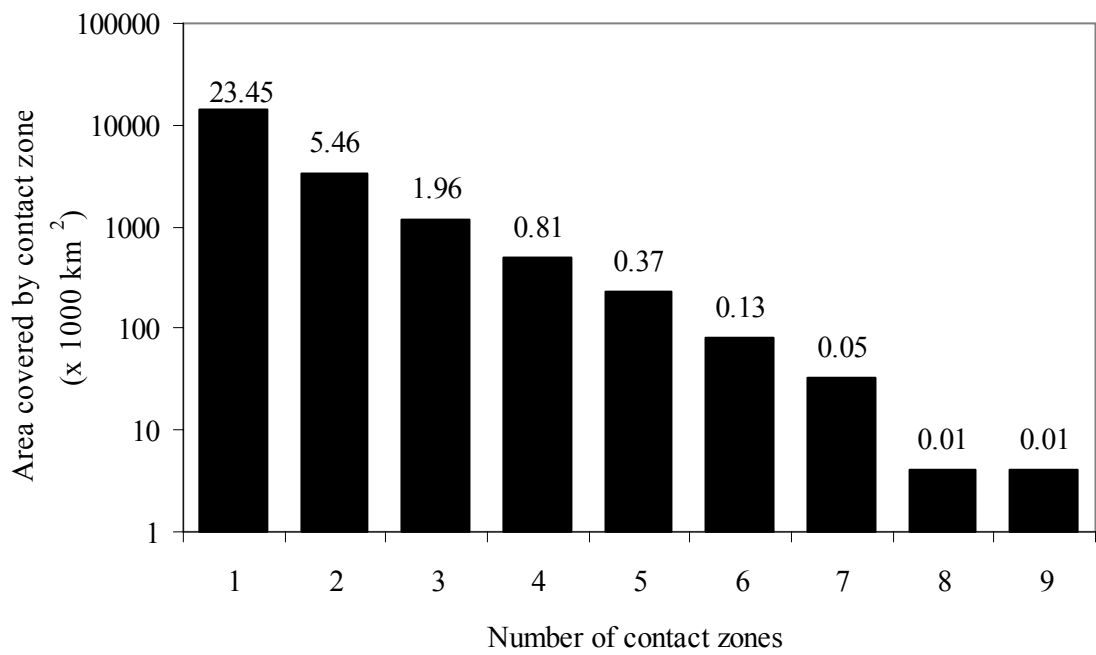

Supplement: rsbl20040258s04.pdf [file rsbl20040258s04.pdf]
